# Supplementary material for: PP2A-B55/SUR-6 collaborates with the nuclear lamina for centrosome separation during mitotic entry
Source: PubMed Central journal article supplement — Mol Biol Cell. 2019 Mar 21;30(7):876–86. doi: 10.1091/mbc.E18-10-0631 (PMC6589783; doi:10.1091/mbc.e18-10-0631), 2019-03-21

# Supplemental Materials

*Molecular Biology of the Cell*

Boudreau et al.

**Figure S1 | Partial *dhc-1/lis-1* and *zyg-12/sun-1* RNAi affect centrosome separation through separate mechanisms.** (A) Representative maximum intensity projections of embryonic confocal stacks. All RNAi treatments were performed with L4 stage worms expressing H2B:GFP and  $\gamma$ -tubulin:GFP for 24 hours via feeding unless otherwise noted. Scale bar = 10  $\mu$ m. (B)(C) Centrosome-centrosome distance and centrosome-male pronucleus distance were measured in 3D between respective centroids. Error bars are SEM and are represented as shaded areas around means. n of embryos analyzed per condition > 10. Statistics: *t* test where \*P < 0.05. Time t = 0 s corresponds to centrosome separation.

**Figure S2 | Cytoplasmic microtubule growth velocities prior to pronuclear migration.** (A)(B)(C)(D)(E)(F) Frequency distributions of cytoplasmic microtubule growth velocities prior to pronuclear migration. The black dashed line represents a threshold over which microtubules are assumed to be accelerated. The grey dashed curves represent a gaussian distribution fit to control cytoplasmic microtubule growth velocities. n of microtubules analyzed per condition is > 50 across > 3 embryos. Frequency distributions between RNAi conditions were statistically non-significantly different ( $p > 0.05$ ) using both Mann-Whitney and Kolmogorov-Smirnov tests. (G) Drawing illustrating the imaging plane, cytoplasmic microtubules in black with green plus ends representing EBP2, and representative single plane confocal image of embryos expressing EBP2:GFP. The yellow trajectory line represents a track for up to 10 frames (2.5 s) following the displayed frame using TrackMate. Scale bar = 10  $\mu\text{m}$ .

**Figure S3 | Quantification of endogenous DHC-1:mNeonGreen mean amounts on female and male pronuclear envelopes.** (A)(B) Mean amounts of DHC-1:mNeonGreen (arbitrary units – a.u.) on the nuclear envelope in (A) 16 hour and 24 hour *dhc-1* RNAi treatments and (B) 24 hour *zyg-12* and *sur-6* RNAi treatments. Quantifications were performed using single slices of confocal stacks from embryos expressing mCherry:HIS-58 and endogenous DHC-1:mNeonGreen. n of embryos analyzed per condition is > 14. Time t = 0 s corresponds to NEBD.

**Figure S4 | Pronuclear cross-sectional area measurements during pronuclear expansion.** Pronuclear cross-sectional areas ( $\mu\text{m}^2$ ) were measured using maximum intensity projections of mCherry:HIS-58 confocal stacks from embryos expressing mCherry:HIS-58 and endogenous DHC-1:mNeonGreen. Female and male pronuclei were analyzed in 24 hour *zyg-12* and *sur-6* RNAi treatments. n of embryos analyzed per condition is > 14. Time t = 0 s corresponds to NEBD.

**Figure S5 | Cytosim-based computational simulations predict 24 hour *sur-6* RNAi effects on cortical Dynein motoring activity are not sufficient to affect centrosome separation.** Predicted centrosome-centrosome distances in simulated control embryos and in embryos with a 50% reduction in cortical Dynein motoring velocity. Error bars are SEM and are represented as shaded areas around means of 10 simulation runs per condition. Time  $t = 0$  s corresponds to centrosome separation.

FIGURE S1

H2B:GFP +  $\gamma$ -tubulin:GFP

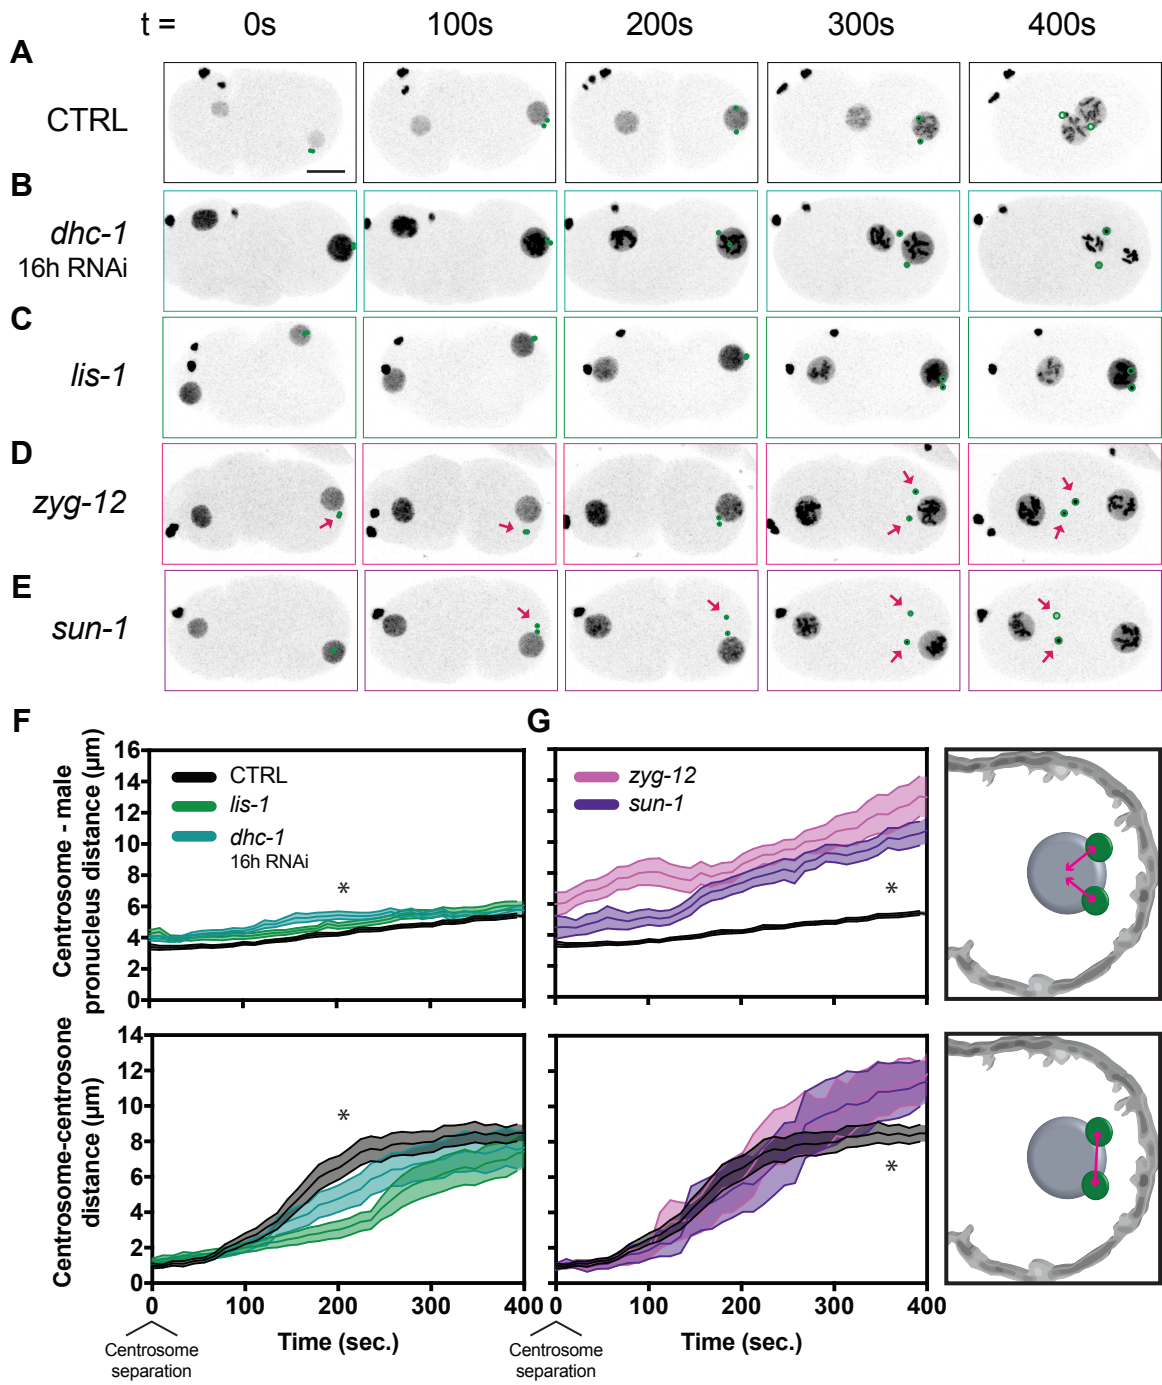

FIGURE S2

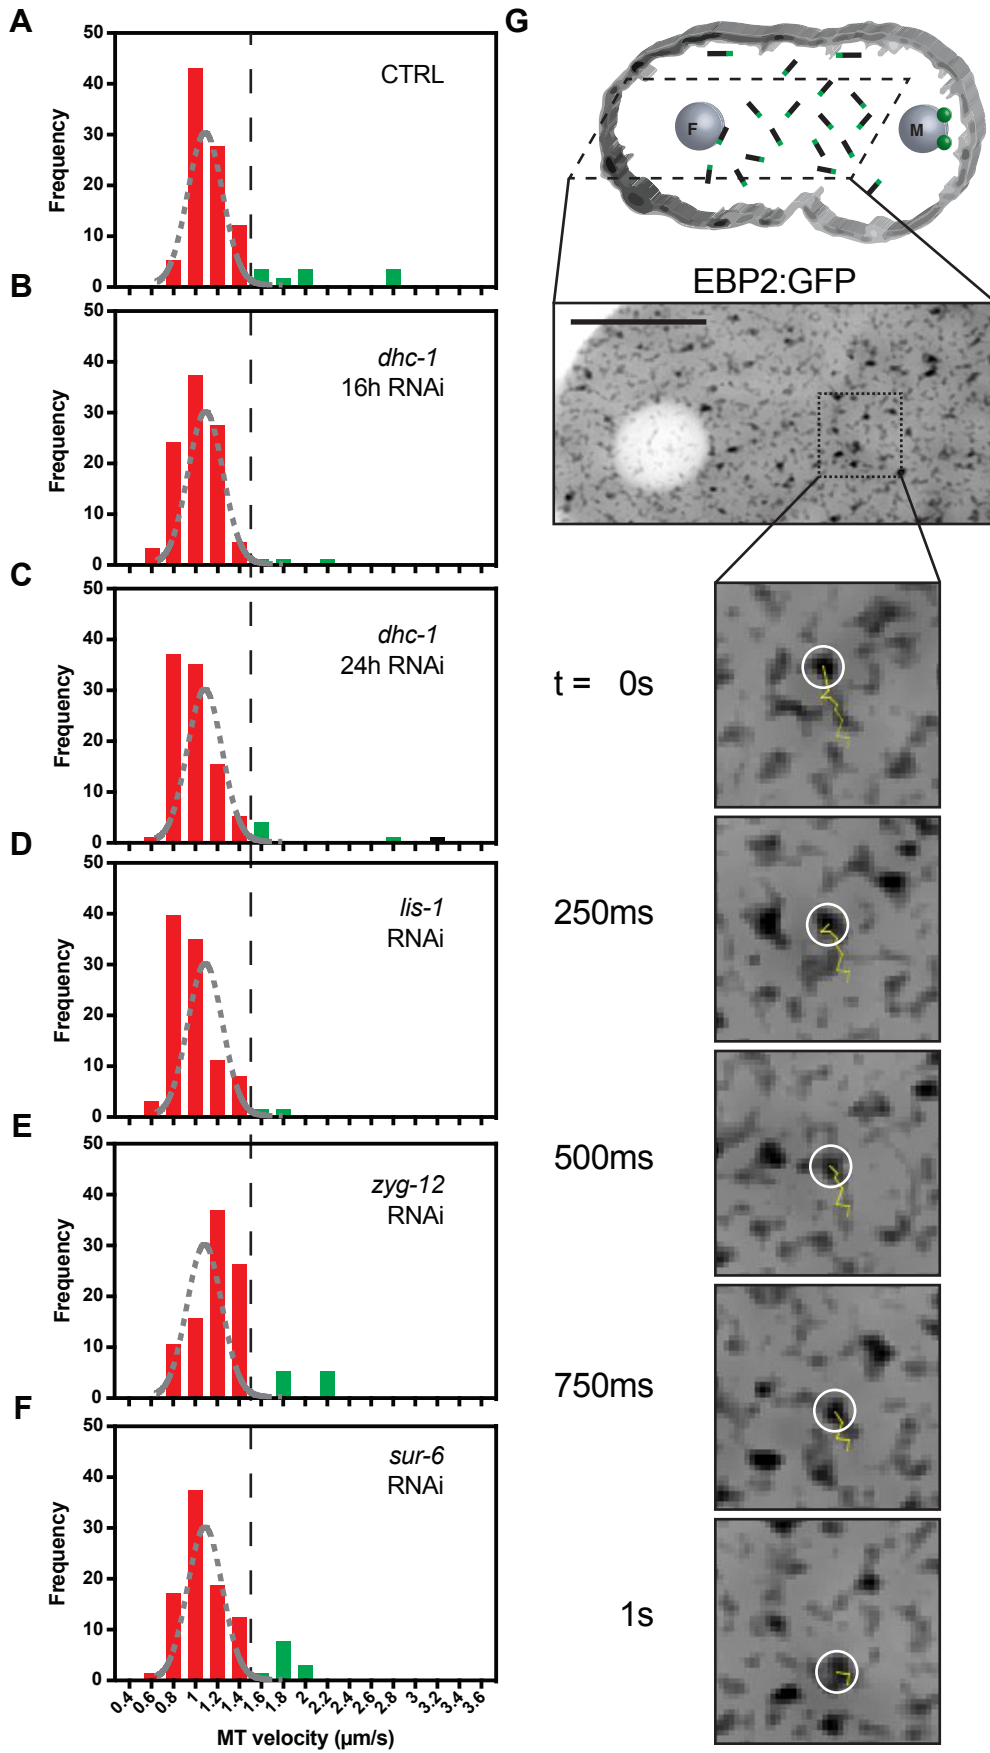



FIGURE S3

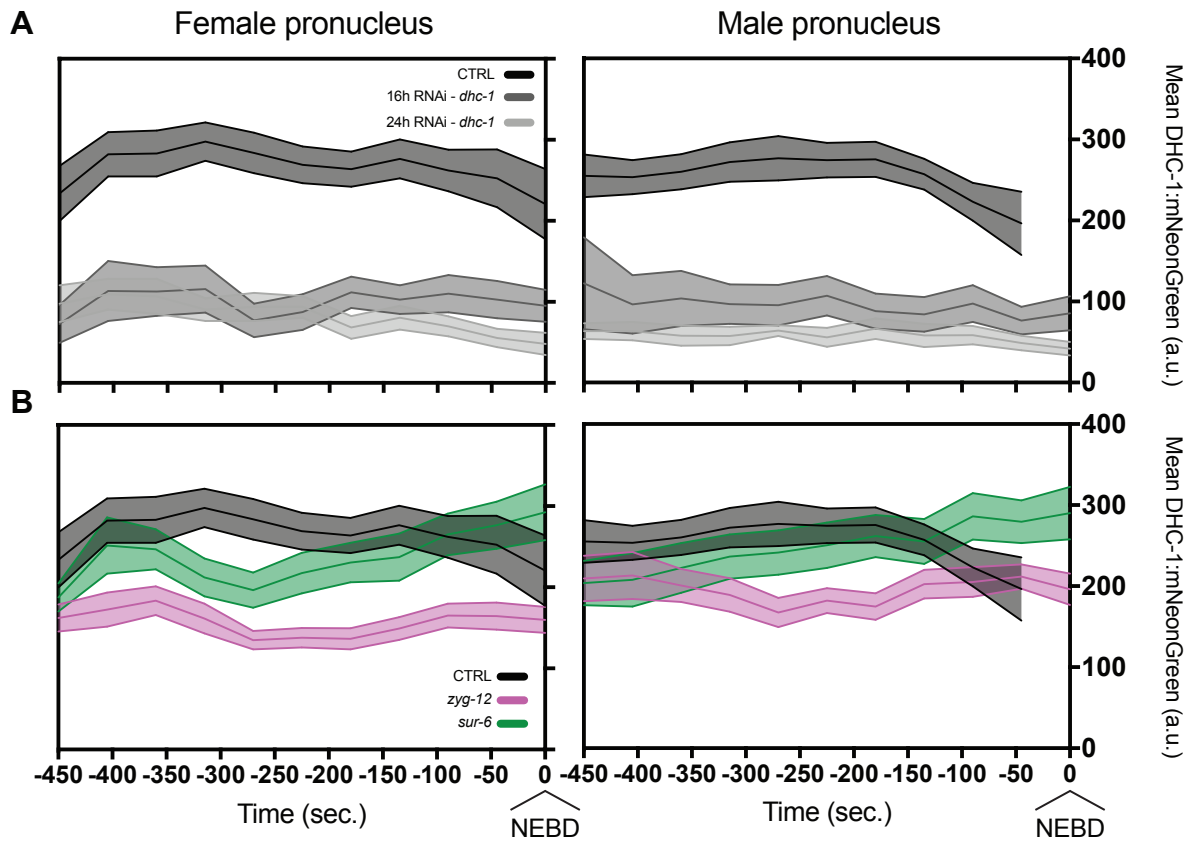

FIGURE S4

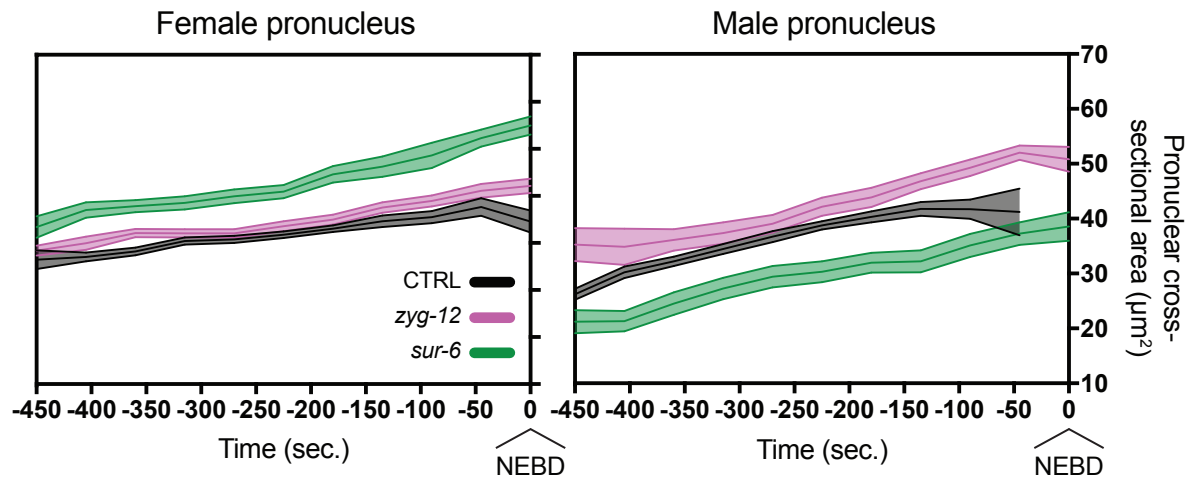

FIGURE S5

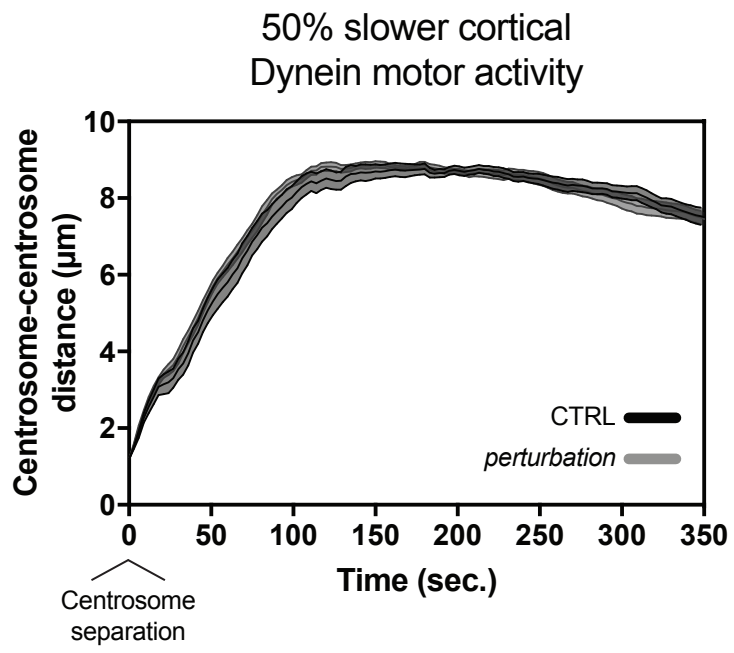

Supplement: mbc-30-876-s001.pdf [file mbc-30-876-s001.pdf]
